# Supplementary material for: Attitudes toward COVID-19 Vaccination: A Survey of Chinese Patients with Rheumatic Diseases
Source: MDPI journal article supplement (doi:10.3390/vaccines10101604), 2022-09-23
Supplement: s1 [file s1]

**Table S1. Full questionnaire of Attitudes Toward COVID-19 Vaccination: A Survey in Chinese Patients with Rheumatic Diseases**

| Section A: Demographic information |                         |                                                                                                                                                                                                                                                                                                                                                                                                                                                                                                                                                                                                                                                                                                                                               |
|------------------------------------|-------------------------|-----------------------------------------------------------------------------------------------------------------------------------------------------------------------------------------------------------------------------------------------------------------------------------------------------------------------------------------------------------------------------------------------------------------------------------------------------------------------------------------------------------------------------------------------------------------------------------------------------------------------------------------------------------------------------------------------------------------------------------------------|
| 1                                  | Gender                  | 1. Male<br>2. Female                                                                                                                                                                                                                                                                                                                                                                                                                                                                                                                                                                                                                                                                                                                          |
| 2                                  | Age                     | ___years old                                                                                                                                                                                                                                                                                                                                                                                                                                                                                                                                                                                                                                                                                                                                  |
| 3                                  | Disease                 | 1. Rheumatoid arthritis<br>2. Systemic lupus erythematosus<br>3. Sjogren's syndrome<br>4. Systemic sclerosis / scleroderma<br>5. Polymyositis and dermatomyositis<br>6. Ankylosing spondylitis<br>7. Psoriatic arthritis<br>8. Inflammatory bowel disease arthritis<br>9. Reactive arthritis<br>10. Adult still disease<br>11. Juvenile idiopathic arthritis<br>12. Vasculitis<br>13. Takayasu arteritis<br>14. Giant cell arteritis<br>15. Nodular polyarteritis<br>16. Behcet's disease<br>17. Osteoarthritis<br>18. Antiphospholipid syndrome<br>19. IgG4 related diseases<br>20. Rheumatic polymyalgia<br>21. Fibromyalgia syndrome<br>22. Undifferentiated connective tissue disease<br>23. Mixed connective tissue disease<br>24. other |
| 4                                  | Highest education level | 1. Postgraduate degree or above<br>2. Bachelor's degree<br>3. High school graduate or junior college<br>4. Less than high school                                                                                                                                                                                                                                                                                                                                                                                                                                                                                                                                                                                                              |
| 5                                  | Monthly income (RMB)    | 1. >10000<br>2. 5000-10000<br>3. 2500-5000<br>4. <2500<br>5. Inconvenient to disclose                                                                                                                                                                                                                                                                                                                                                                                                                                                                                                                                                                                                                                                         |

|   |                   |                      |
|---|-------------------|----------------------|
| 6 | Location          | 1. City              |
|   |                   | 2. Countryside       |
| 7 | Employment status | 1. On employment     |
|   |                   | 2. Not on employment |
| 8 | Disease status    | 1. Inactive disease  |
|   |                   | 2. Active disease    |
| 9 | Disease status    | Inactive disease     |
|   |                   | Active disease       |

---



---

### Section B: Attitudes toward COVID-19 vaccine

---

|   |                                                      |                        |
|---|------------------------------------------------------|------------------------|
| 1 | Rate your attitudes toward COVID-19 vaccine from 1-5 | 1. completely disagree |
|   |                                                      | 2. somewhat disagree   |
|   |                                                      | 3. neutral/no opinion  |
|   |                                                      | 4. somewhat agree      |
|   |                                                      | 5. completely agree    |

---



---

### Section C: The reasons for refusing vaccination

---

|   |                                                                               |                        |
|---|-------------------------------------------------------------------------------|------------------------|
| 1 | Rate your attitudes toward concerns about adverse effect from 1-5             | 1. completely disagree |
|   |                                                                               | 2. somewhat disagree   |
|   |                                                                               | 3. neutral/no opinion  |
|   |                                                                               | 4. somewhat agree      |
|   |                                                                               | 5. completely agree    |
| 2 | Rate your attitudes toward concerns about disease flare from 1-5              | 1. completely disagree |
|   |                                                                               | 2. somewhat disagree   |
|   |                                                                               | 3. neutral/no opinion  |
|   |                                                                               | 4. somewhat agree      |
|   |                                                                               | 5. completely agree    |
| 3 | Rate your attitudes toward concerns about causing COVID-19 infection from 1-5 | 1. completely disagree |
|   |                                                                               | 2. somewhat disagree   |
|   |                                                                               | 3. neutral/no opinion  |
|   |                                                                               | 4. somewhat agree      |
|   |                                                                               | 5. completely agree    |
| 4 | Rate your attitudes toward concerns about invalidity of vaccines from 1-5     | 1. completely disagree |
|   |                                                                               | 2. somewhat disagree   |
|   |                                                                               | 3. neutral/no opinion  |
|   |                                                                               | 4. somewhat agree      |
|   |                                                                               | 5. completely agree    |

---

---

**Section D: Current status of vaccination and adverse events**

---

|   |                                                                                                                    |                                                                                                                                                                    |
|---|--------------------------------------------------------------------------------------------------------------------|--------------------------------------------------------------------------------------------------------------------------------------------------------------------|
| 1 | Have you been vaccinated?                                                                                          | 1. Yes<br>2. No                                                                                                                                                    |
| 2 | If you have been vaccinated, do you have any adverse effect after vaccination? ( multiple choices, open questions) | 1. redness, swelling and pain at the inoculation site<br>2. fever<br>3. weakness<br>4. nausea<br>5. headache<br>6. Muscle soreness<br>7. thrombus<br>8. Other_____ |
| 3 | If you have been vaccinated, rate the effect of personal willingness on vaccination from 1-5                       | 1. completely disagree<br>2. somewhat disagree<br>3. neutral/no opinion<br>4. somewhat agree<br>5. completely agree                                                |
| 4 | If you have been vaccinated, were you vaccinated because community requirements? Rate it from 1-5.                 | 1. completely disagree<br>2. somewhat disagree<br>3. neutral/no opinion<br>4. somewhat agree<br>5. completely agree                                                |
| 5 | If you have been vaccinated, were you vaccinated because work requirements? Rate it from 1-5.                      | 1. completely disagree<br>2. somewhat disagree<br>3. neutral/no opinion<br>4. somewhat agree<br>5. completely agree                                                |
| 6 | If you have been vaccinated, were you vaccinated because personal willingness? Rate it from 1-5.                   | 1. completely disagree<br>2. somewhat disagree<br>3. neutral/no opinion<br>4. somewhat agree<br>5. completely agree                                                |
| 7 | If you have been vaccinated, were you vaccinated because doctor's recommendation? Rate it from 1-5.                | 1. completely disagree<br>2. somewhat disagree<br>3. neutral/no opinion<br>4. somewhat agree<br>5. completely agree                                                |

---

---

**Section E: Confidence of COVID-19 infection in future**

---

|   |                                                 |                                                                                                                                                                                               |
|---|-------------------------------------------------|-----------------------------------------------------------------------------------------------------------------------------------------------------------------------------------------------|
| 1 | Do you think you will get COVID-19 in 6 months? | <ol style="list-style-type: none"><li>1. I will not be infected</li><li>2. I will get a mild case</li><li>3. I will get seriously ill</li><li>4. I have already had the coronavirus</li></ol> |
|---|-------------------------------------------------|-----------------------------------------------------------------------------------------------------------------------------------------------------------------------------------------------|

---

---

**Section F: Knowledge source of the COVID-19 vaccine.**

---

|    |                                                    |                                                                                                                                                                                                                                                                                              |
|----|----------------------------------------------------|----------------------------------------------------------------------------------------------------------------------------------------------------------------------------------------------------------------------------------------------------------------------------------------------|
| 1  | Where did you get COVID-19 vaccine knowledge?      | <ol style="list-style-type: none"><li>1. Internet</li><li>2. Television</li><li>3. Popular science</li><li>4. Discussion with colleagues or friends</li><li>5. Propaganda of the community</li><li>6. Guidance of doctors</li><li>7. Do not understand any knowledge about vaccine</li></ol> |
| 2  | Have you ever consulted a rheumatologist?          | <ol style="list-style-type: none"><li>1. Yes</li><li>2. No</li></ol>                                                                                                                                                                                                                         |
| 3. | Did the rheumatologist suggest you get vaccinated? | <ol style="list-style-type: none"><li>1. Yes</li><li>2. No</li></ol>                                                                                                                                                                                                                         |

---

**Table S2. Knowledge source of COVID-19 vaccine and confidence of COVID-19 infection**

| Knowledge source and Confidence                 | Data   |          |
|-------------------------------------------------|--------|----------|
| Knowledge source*                               | N=1026 |          |
| Internet                                        | 716    | (69.79%) |
| Television                                      | 316    | (30.80%) |
| Popular science                                 | 354    | (34.50%) |
| Discussion with colleagues or friends           | 267    | (26.02%) |
| Propaganda of the community                     | 366    | (35.67%) |
| Guidance of doctors                             | 304    | (29.63%) |
| Do not understand any knowledge about vaccine   | 2      | (0.19%)  |
| Confidence                                      | N=1026 |          |
| Do you think you will get COVID-19 in 6 months? |        |          |
| I will not be infected                          | 902    | (87.91%) |
| I will get a mild case                          | 73     | (7.12%)  |
| I will get seriously ill                        | 51     | (4.97%)  |
| I have already had the coronavirus              | 0      | (0.00%)  |

\*A patient can choose more than two knowledge sources

Figure S1. The Related-Samples Wilcoxon Signed Rank Test Summary of reasons for refusing vaccination.

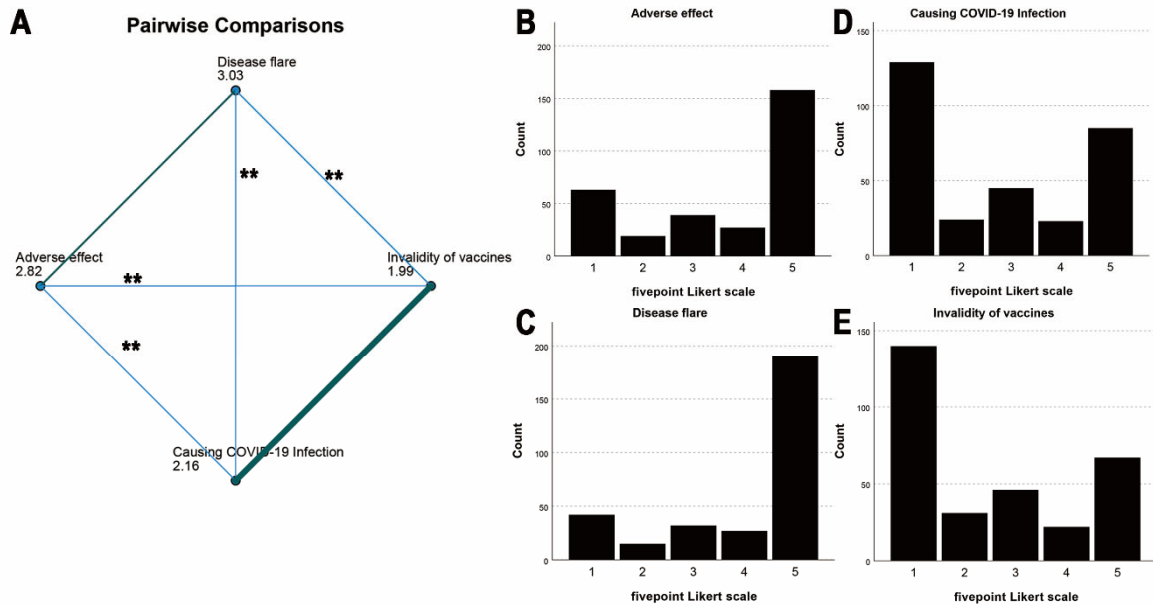

A: Pairwise Comparisons of the reasons for refusing vaccination. One asterisk (\*) next to the connection indicates statistical difference at  $p < 0.05$ , and two asterisks (\*\*) indicate statistical difference at  $p < 0.01$ . B-E: The count of five-point Likert scale of Adverse effect, Disease flare, Causing COVID-19 Infection and Invalidity of vaccines separately.

Figure S2. The Related-Samples Wilcoxon Signed Rank Test Summary of reasons for vaccination.

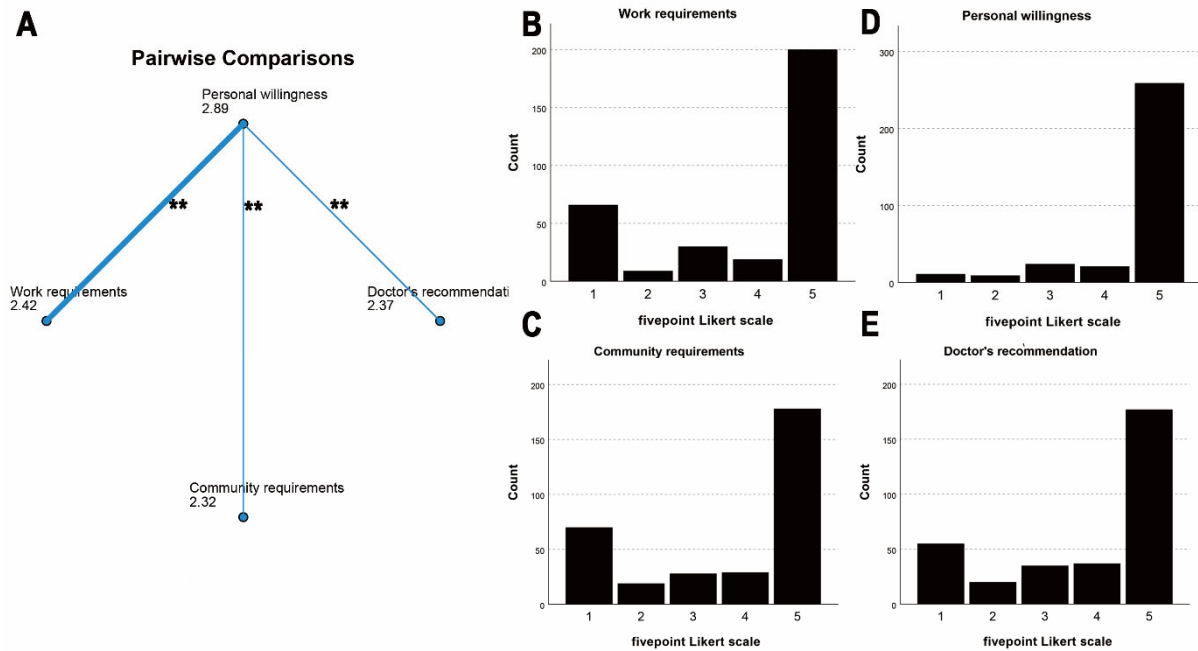

A: Pairwise Comparisons of the reasons for vaccination. One asterisk (\*) next to the connection indicates statistical difference at  $p < 0.05$ , and two asterisks (\*\*) indicate statistical difference at  $p < 0.01$ . B-E: The count of five-point Likert scale of Work requirements, Community requirements, Personal willingness and Doctor's recommendation separately.
